# Supplementary material for: Fenton-like degradation of bisphenol A by Fe3O4 rhombic dodecahedrons
Source: Royal Society of Chemistry journal article supplement (doi:10.1039/d3nj01623d), 2023-01-01
Supplement: d3nj01623d1.pdf [file d3nj01623d1.pdf]

## Supplementary data

for

### Fenton-like degradation of bisphenol A by Fe<sub>3</sub>O<sub>4</sub> rhombic dodecahedrons

Jinglin Zhu<sup>1,2\*</sup>, Meng Zhu<sup>1,2</sup>, Juanjuan Peng<sup>1,2</sup>

<sup>1</sup> School of Earth and Environment, Anhui University of Science and Technology, Huainan

232001, China

<sup>2</sup> State Key Laboratory of Mining Response and Disaster Prevention and Control in Deep Coal

Mines (Anhui University of Science and Technology), Huainan 232001, China

\*To whom correspondence should be addressed.

E-mail: [jlzhu@aust.edu.cn](mailto:jlzhu@aust.edu.cn)

Number of pages: 11

Number of tables: 3

Number of figures: 5

### List of Supplementary data

**Table S1** Basic properties of  $\text{Fe}_3\text{O}_4\text{-R}$  before and after reaction in the cycle experiments.

**Table S2** Comparison of  $\text{Fe}_3\text{O}_4\text{-R}$  with other  $\text{Fe}_3\text{O}_4$  catalysts in references.

**Table S3** LC/MS intermediates obtained during Fenton-like degradation of BPA using  $\text{Fe}_3\text{O}_4\text{-R}$ .

**Fig. S1** (a) FTIR spectrum and (b) XPS spectrum of  $\text{Fe}_3\text{O}_4\text{-R}$ .

**Fig. S2** Nitrogen adsorption-desorption isotherm and its pore size distribution (inset) of  $\text{Fe}_3\text{O}_4\text{-C}$ .

**Fig. S3** The concentration of Fe leaching and Fe(II) in the  $\text{Fe}_3\text{O}_4\text{-R}/\text{H}_2\text{O}_2$  system.

**Fig. S4** Estimated contribution of homogeneous and heterogeneous systems to the BPA degradation in the  $\text{Fe}_3\text{O}_4\text{-R}/\text{H}_2\text{O}_2$  system.

**Fig. S5** Reuse performance of  $\text{Fe}_3\text{O}_4\text{-R}$  for Fenton-like degradation of BPA.

**Table S1** Basic properties of Fe<sub>3</sub>O<sub>4</sub>-R before and after reaction in the cycle experiments.

| <b>Samples</b>                          | <b>BET surface</b>                         | <b>Pore Volume</b>                     | <b>Pore size</b> | <b>Surface Fe(II)/Fe(III)</b> |
|-----------------------------------------|--------------------------------------------|----------------------------------------|------------------|-------------------------------|
|                                         | <b>area (m<sup>2</sup> g<sup>-1</sup>)</b> | <b>(cm<sup>3</sup> g<sup>-1</sup>)</b> | <b>(nm)</b>      | <b>ratio</b>                  |
| Fresh Fe <sub>3</sub> O <sub>4</sub> -R | 19.99                                      | 0.041                                  | 2.12             | 63.51%                        |
| Used Fe <sub>3</sub> O <sub>4</sub> -R  | 18.56                                      | 0.035                                  | 1.65             | 50.53%                        |

**Table S2** Comparison of Fe<sub>3</sub>O<sub>4</sub>-R with other Fe<sub>3</sub>O<sub>4</sub> catalysts in references.

| Catalysts                                             | Catalyst dosage (g L <sup>-1</sup> ) | H <sub>2</sub> O <sub>2</sub> dosage (mM) | Pollutant concentration (mM)         | Initial pH | Removal efficiency | Ref.      |
|-------------------------------------------------------|--------------------------------------|-------------------------------------------|--------------------------------------|------------|--------------------|-----------|
| Superparamagnetic Fe <sub>3</sub> O <sub>4</sub>      | 5                                    | 1.2                                       | phenol (1)                           | 6.0-7.0    | 60% (6 h)          | 1         |
| Fe <sub>3</sub> O <sub>4</sub> nanoparticles          | 1.0                                  | 12                                        | 2,4-dichlorophenol (0.61)            | 3.0        | 51% (180 min)      | 2         |
| Nano-Fe <sub>3</sub> O <sub>4</sub>                   | 1.0                                  | 0.05                                      | 4-chlorocatechol (10 <sup>-3</sup> ) | 6.5        | 100% (3 h)         | 3         |
| Nano-sized Fe <sub>3</sub> O <sub>4</sub>             | 0.25                                 | 40                                        | phenol (6.38)                        | 4.0        | 98% (90 min)       | 4         |
| Nanosized Fe <sub>3</sub> O <sub>4</sub>              | 0.5                                  | UV-Fenton (11.8)                          | catechol (0.9)                       | 3.0        | 84% (240 min)      | 5         |
| magnetite                                             | 0.2                                  | UVA-Fenton (1)                            | phenol (0.1)                         | 3.0        | 100% (4 h)         | 6         |
| Fe <sub>3</sub> O <sub>4</sub> magnetic nanoparticles | 0.585                                | Sono-Fenton (160)                         | BPA (0.09)                           | 3.0        | 100% (500 min)     | 7         |
| Fe <sub>3</sub> O <sub>4</sub> -R                     | 0.1                                  | 0.2                                       | BPA (0.1)                            | 5.0        | 100% (30 min)      | This work |

**Table S3** LC/MS intermediates obtained during Fenton-like degradation of BPA using Fe<sub>3</sub>O<sub>4</sub>-R.

| Product | Experimental mass<br>[M-H] <sup>+</sup> m/z | RT   | Molecular Formula                              | Tentative structure                                                                   |
|---------|---------------------------------------------|------|------------------------------------------------|---------------------------------------------------------------------------------------|
| BPA     | 227.1045                                    | 2.64 | C <sub>15</sub> H <sub>16</sub> O <sub>2</sub> | 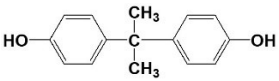   |
| TP243   | 243.0993                                    | 2.01 | C <sub>15</sub> H <sub>16</sub> O <sub>3</sub> |    |
| TP241   | 241.0838                                    | 1.70 | C <sub>15</sub> H <sub>14</sub> O <sub>3</sub> |    |
| TP275   | 275.0477                                    | 1.36 | C <sub>15</sub> H <sub>16</sub> O <sub>5</sub> |    |
| TP135   | 135.0424                                    | 1.42 | C <sub>8</sub> H <sub>8</sub> O <sub>2</sub>   |  |
| TP167   | 167.0683                                    | 1.35 | C <sub>9</sub> H <sub>12</sub> O <sub>3</sub>  |  |

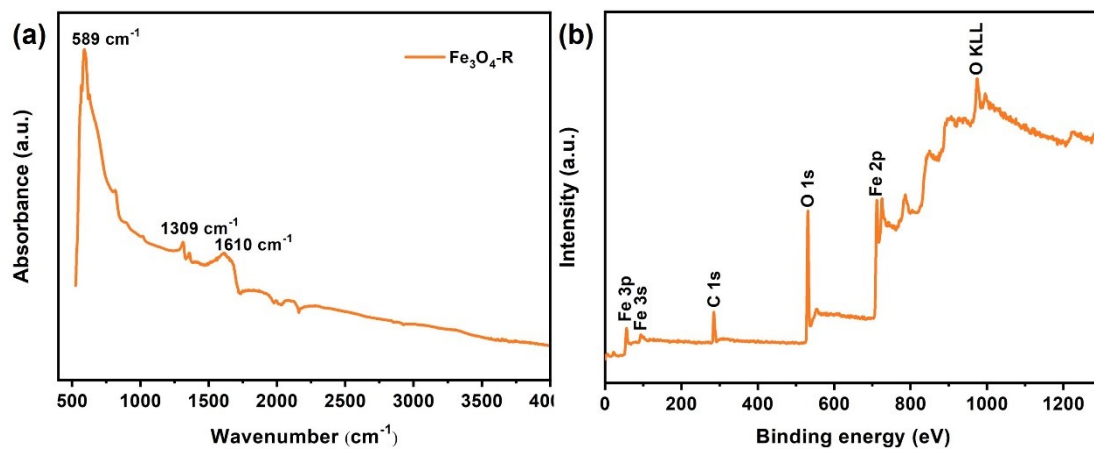

**Fig. S1** (a) FTIR spectrum and (b) XPS spectrum of Fe<sub>3</sub>O<sub>4</sub>-R.

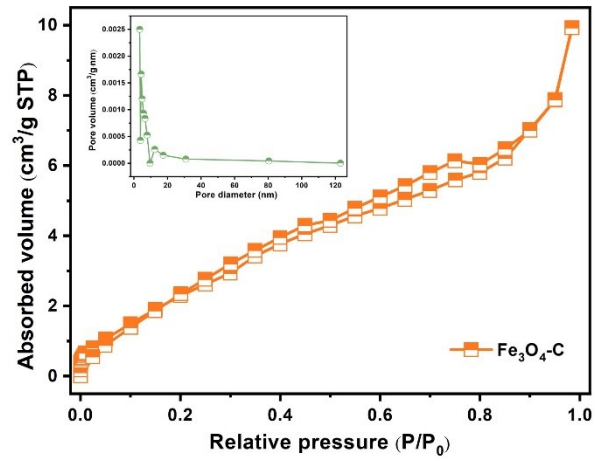

**Fig. S2** Nitrogen adsorption-desorption isotherm and its pore size distribution (inset) of Fe<sub>3</sub>O<sub>4</sub>-C.

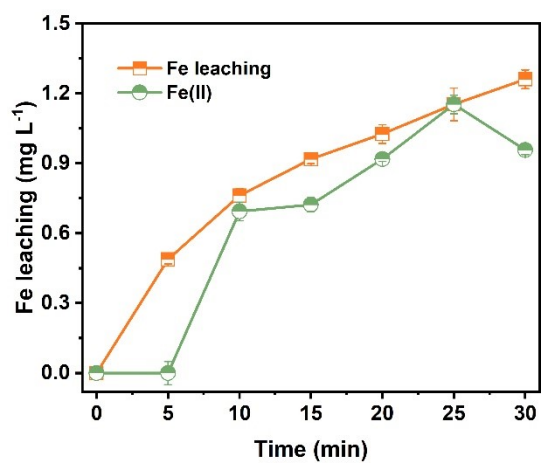

**Fig. S3** The concentration of Fe leaching and Fe(II) in the  $\text{Fe}_3\text{O}_4\text{-R}/\text{H}_2\text{O}_2$  system.

Conditions:  $[\text{catalyst}]_0 = 0.1 \text{ g L}^{-1}$ ,  $[\text{H}_2\text{O}_2]_0 = 5 \text{ mM}$ ,  $[\text{BPA}]_0 = 0.1 \text{ mM}$ , and initial pH

= 5.0.



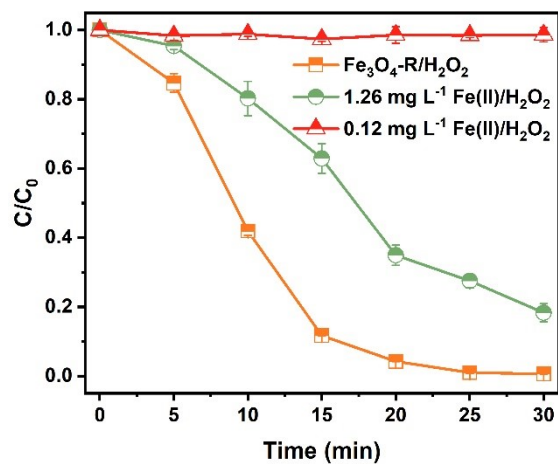

**Fig. S4** Estimated contribution of homogeneous and heterogeneous systems to the BPA degradation in the  $\text{Fe}_3\text{O}_4\text{-R}/\text{H}_2\text{O}_2$  system. Conditions:  $[\text{catalyst}]_0 = 0.1 \text{ g L}^{-1}$ ,  $[\text{H}_2\text{O}_2]_0 = 5 \text{ mM}$ ,  $[\text{BPA}]_0 = 0.1 \text{ mM}$ , and initial  $\text{pH} = 5.0$ .

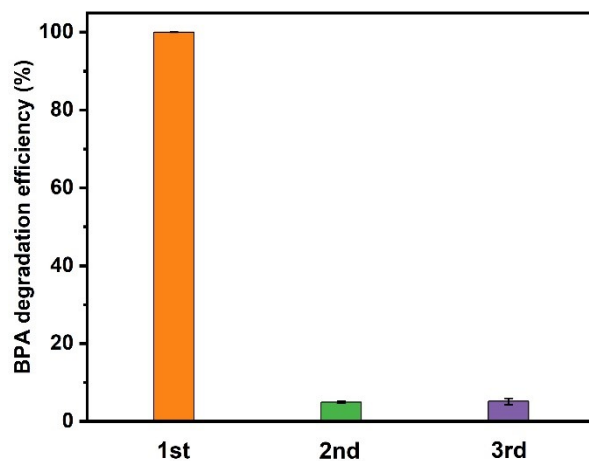

**Fig. S5** Reuse performance of Fe<sub>3</sub>O<sub>4</sub>-R for Fenton-like degradation of BPA.

Conditions: [catalyst]<sub>0</sub> = 0.1 g L<sup>-1</sup>, [H<sub>2</sub>O<sub>2</sub>]<sub>0</sub> = 5 mM, [BPA]<sub>0</sub> = 0.1 mM, and initial pH

= 5.0.

## Reference

- [1] S. Zhang, X. Zhao, H. Niu, Y. Shi, Y. Cai and G. Jiang, Superparamagnetic  $\text{Fe}_3\text{O}_4$  nanoparticles as catalysts for the catalytic oxidation of phenolic and aniline compounds, *J. Hazard. Mater.*, 2009, **167**, 560-566.
- [2] L. Xu and J. Wang, Fenton-like degradation of 2,4-dichlorophenol using  $\text{Fe}_3\text{O}_4$  magnetic nanoparticles, *Appl. Catal. B: Environ.*, 2012, **123-124**, 117-126.
- [3] J. He, X. Yang, B. Men, Z. Bi, Y. Pu and D. Wang, Heterogeneous Fenton oxidation of catechol and 4-chlorocatechol catalyzed by nano- $\text{Fe}_3\text{O}_4$ : Role of the interface, *Chem. Eng. J.*, 2014, **258**, 433-441.
- [4] L. Hou, Q. Zhang, F. Jérôme, D. Duprez, H. Zhang and S. Royer, Shape-controlled nanostructured magnetite-type materials as highly efficient Fenton catalysts, *Appl. Catal. B: Environ.*, 2014, **144**, 739-749.
- [5] W. Li, Y. Wang and A. Irini, Effect of pH and  $\text{H}_2\text{O}_2$  dosage on catechol oxidation in nano- $\text{Fe}_3\text{O}_4$  catalyzing UV-Fenton and identification of reactive oxygen species, *Chem. Eng. J.*, 2014, **244**, 1-8.
- [6] M. Minella, G. Marchetti, E. De Laurentiis, M. Malandrino, V. Maurino, C. Minero, D. Vione and K. Hanna, Photo-Fenton oxidation of phenol with magnetite as iron source, *Appl. Catal. B: Environ.*, 2014, **154-155**, 102-109.
- [7] R. Huang, Z. Fang, X. Yan and W. Cheng, Heterogeneous sono-Fenton catalytic degradation of bisphenol A by  $\text{Fe}_3\text{O}_4$  magnetic nanoparticles under neutral condition, *Chem. Eng. J.*, 2012, **197**, 242-249.
